# Supplementary material for: A focus groups study of staff team experiences of providing interdisciplinary rehabilitation for people with dementia and their caregivers—a co-creative journey
Source: PubMed Central journal article supplement (PMC10507912; doi:10.1186/s12877-023-04269-3), 2023-09-18
Supplement: 12877_2023_4269_MOESM1_ESM.pdf [file 12877_2023_4269_MOESM1_ESM.pdf]

## Supplementary file 1 – Interview guide

Topics in the semi-structured interview guide used with staff team providing rehabilitation to older adults with dementia, including education and support for informal caregivers

### Older adult with dementia and primary caregiver

Tell about :

- a situation where the team work made a difference to the better
- when the team was especially important to the older adult
- when the team was especially important to the caregiver
- a situation when it was difficult to make a difference

Describe the cooperation between the older adult – the team – the caregiver

### Teamwork

Cooperation in the extended team

Working with many professions

Learning experiences:

- from other professions and over time
- own reflections on teamwork during the

### Experiences

Joy – Challenges - Frustrations

Take home experiences

### Expectations on the teamwork project

Expectations on the project when starting

Did it turn out as you expected?
